# Supplementary material
Source: PubMed Central journal article supplement (PMC2631140)
Supplement: neo1102_0157SD1.pdf [file neo1102_0157SD1.pdf]

## Supplementary Material and Methods

### Immunofluorescence

Cultured cells on glass coverslips were stained by an indirect immunofluorescence method. Cells were rinsed in PBS and fixed with 3.7% formaldehyde in PBS for 10 minutes at room temperature. They were permeabilized with PBS plus 0.5% Triton X-100 for 5 minutes. Cells were treated overnight at 4°C, with PBS containing 1% BSA to block nonspecific binding sites. They were then incubated with primary antibodies: rabbit anti-ZEB-1 (1:50; Santa Cruz Biotechnology) or mouse anti-E-Cadherin (1:100; BD Biosciences) in PBS for 2 hours

at room temperature. The same anti-ZEB-1 antibodies were used for Western blot analysis and ChIP assay. After three washes with PBS, 5 minutes at room temperature, cells were incubated for 30 minutes with goat antirabbit IgG conjugated to the fluorescent Alexa 488 dye (1:400; Invitrogen Molecular Probe, Leiden, Netherlands) or with goat antimouse IgG conjugated to the fluorescent Alexa 555 dye (1:400; Invitrogen Molecular Probe) in PBS containing the fluorescent nuclear probes TOPRO3 (1:250; Invitrogen Molecular Probe). After three washes, samples were mounted in Vectashield Medium (Vector Laboratories Inc, Abcys, Paris, France) for viewing with a confocal microscope (FV 1000, Olympus IX-81, Tokyo, Japan).

**Table W1.** Primer Sequences for Real-time Quantitative RT-PCR (A), ChIP assays (B), ZEB-1 and SEMA3F siRNA (C), E-box Site-Directed Mutagenesis (D), and Luciferase Reporter Construct with Restriction Sites Underlined (E).

| Primer Name                                                  | Primer Sense | Primer Sequence (5'→3')             | Amplicon Size (bp) |
|--------------------------------------------------------------|--------------|-------------------------------------|--------------------|
| (A) Real-time quantitative RT-PCR primers                    |              |                                     |                    |
| GAPDH                                                        | Forward      | TGCACCACCAACTGCTTAGC                | 87                 |
|                                                              | Reverse      | GGCATGGACTGTGGTCATGAG               |                    |
| SEMA3F                                                       | Forward      | AGCAGACCCAGGACGTGAG                 | 114                |
|                                                              | Reverse      | AAGACCATGCGAATATCAGCC               |                    |
| E-Cadherin                                                   | Forward      | CGGGAATGCAGTTGAGGATC                | 201                |
|                                                              | Reverse      | AGGATGGTGTAAAGCGATGGC               |                    |
| ZEB-1                                                        | Forward      | AGCAGTGAAAGAGAAGGGAATGC             | 226                |
|                                                              | Reverse      | GGTCTCTTCAGGTGCCTCAG                |                    |
| ZEB-2                                                        | Forward      | AGGCATATGGTGACGCACAA                | 78                 |
|                                                              | Reverse      | CTTGAACCTTGCGGTTACCTGC              |                    |
| (B) ChIP primers                                             |              |                                     |                    |
| ChIP E-Cadherin                                              | Forward      | GGCCGGCAGGTGAACCCCTCA               | 108                |
|                                                              | Reverse      | GGGCTGGAGTCTGAACCTGA                |                    |
| A                                                            | Forward      | GGCGTATGGATGTGTGGATGA               | 90                 |
|                                                              | Reverse      | TATGAGAGCACCCACCCAGAAC              |                    |
| B                                                            | Forward      | GATTCTGAAGGTGGCAATGCC               | 100                |
|                                                              | Reverse      | AAACTTCCAGCTCCGCCTCTA               |                    |
| C                                                            | Forward      | GGAGCCCATGAGGATAACCAA               | 86                 |
|                                                              | Reverse      | CCGTAAGCCTCCTTCTCTACA               |                    |
| D                                                            | Forward      | TGTGCCTCGGTTTCTCCATC                | 89                 |
|                                                              | Reverse      | CCCCTTCACAACACCCACC                 |                    |
| E                                                            | Forward      | TTGATGCTGTTGCGTACCCTG               | 99                 |
|                                                              | Reverse      | CACCCAAAGCTAAACCCCTGA               |                    |
| F                                                            | Forward      | CCCTACAGTTCAGCAGCCC                 | 90                 |
|                                                              | Reverse      | CCACCAACCCAGACCCTGAT                |                    |
| (C) Primer sequences for ZEB-1 silencing by RNA interference |              |                                     |                    |
| ZEB-1                                                        | Sense        | AATGCAGATTGAGGCTGATCACCTGTCTC       |                    |
|                                                              | Antisense    | AATGATCAGCCTCAATCTGCACCT GTCTC      |                    |
| SEMA3F genome smart pool M-0176644-02 (Dharmacon)            |              | GAACCGAACACACCCUGUAU                |                    |
|                                                              |              | GCAAGGAUGUCAACGCGGA                 |                    |
|                                                              |              | CAACACAACCGACUACCGA                 |                    |
|                                                              |              | GCUGGUGUGUACAUCGAU                  |                    |
| (D) Site-directed mutagenesis primers                        |              |                                     |                    |
| E-Box mut1                                                   | Forward      | GAAGGGGTGCTTATATTAGCGCAGGCTCGTTGCTC |                    |
|                                                              | Reverse      | GAGCAACGAGCCTGCGCTAATATAAGCACCCCTTC |                    |
| E-Box2 mut2                                                  | Forward      | GGGGCTGCACCGCCATTACCTGAGCAGCCCGGG   |                    |
|                                                              | Reverse      | CCCGGGCTGCTCAGGTAATGGCGGTGCAGCCCC   |                    |
| (E) Primers for luciferase reporter construct                |              |                                     |                    |
| XhoI-5836                                                    | Forward      | GCGCTCGAGCTCAGCAGGATCCCTAGTGCC      |                    |
| 4013-HindIII                                                 | Reverse      | GTTAAGCTTGCACCTCCTTCCGCAG           |                    |

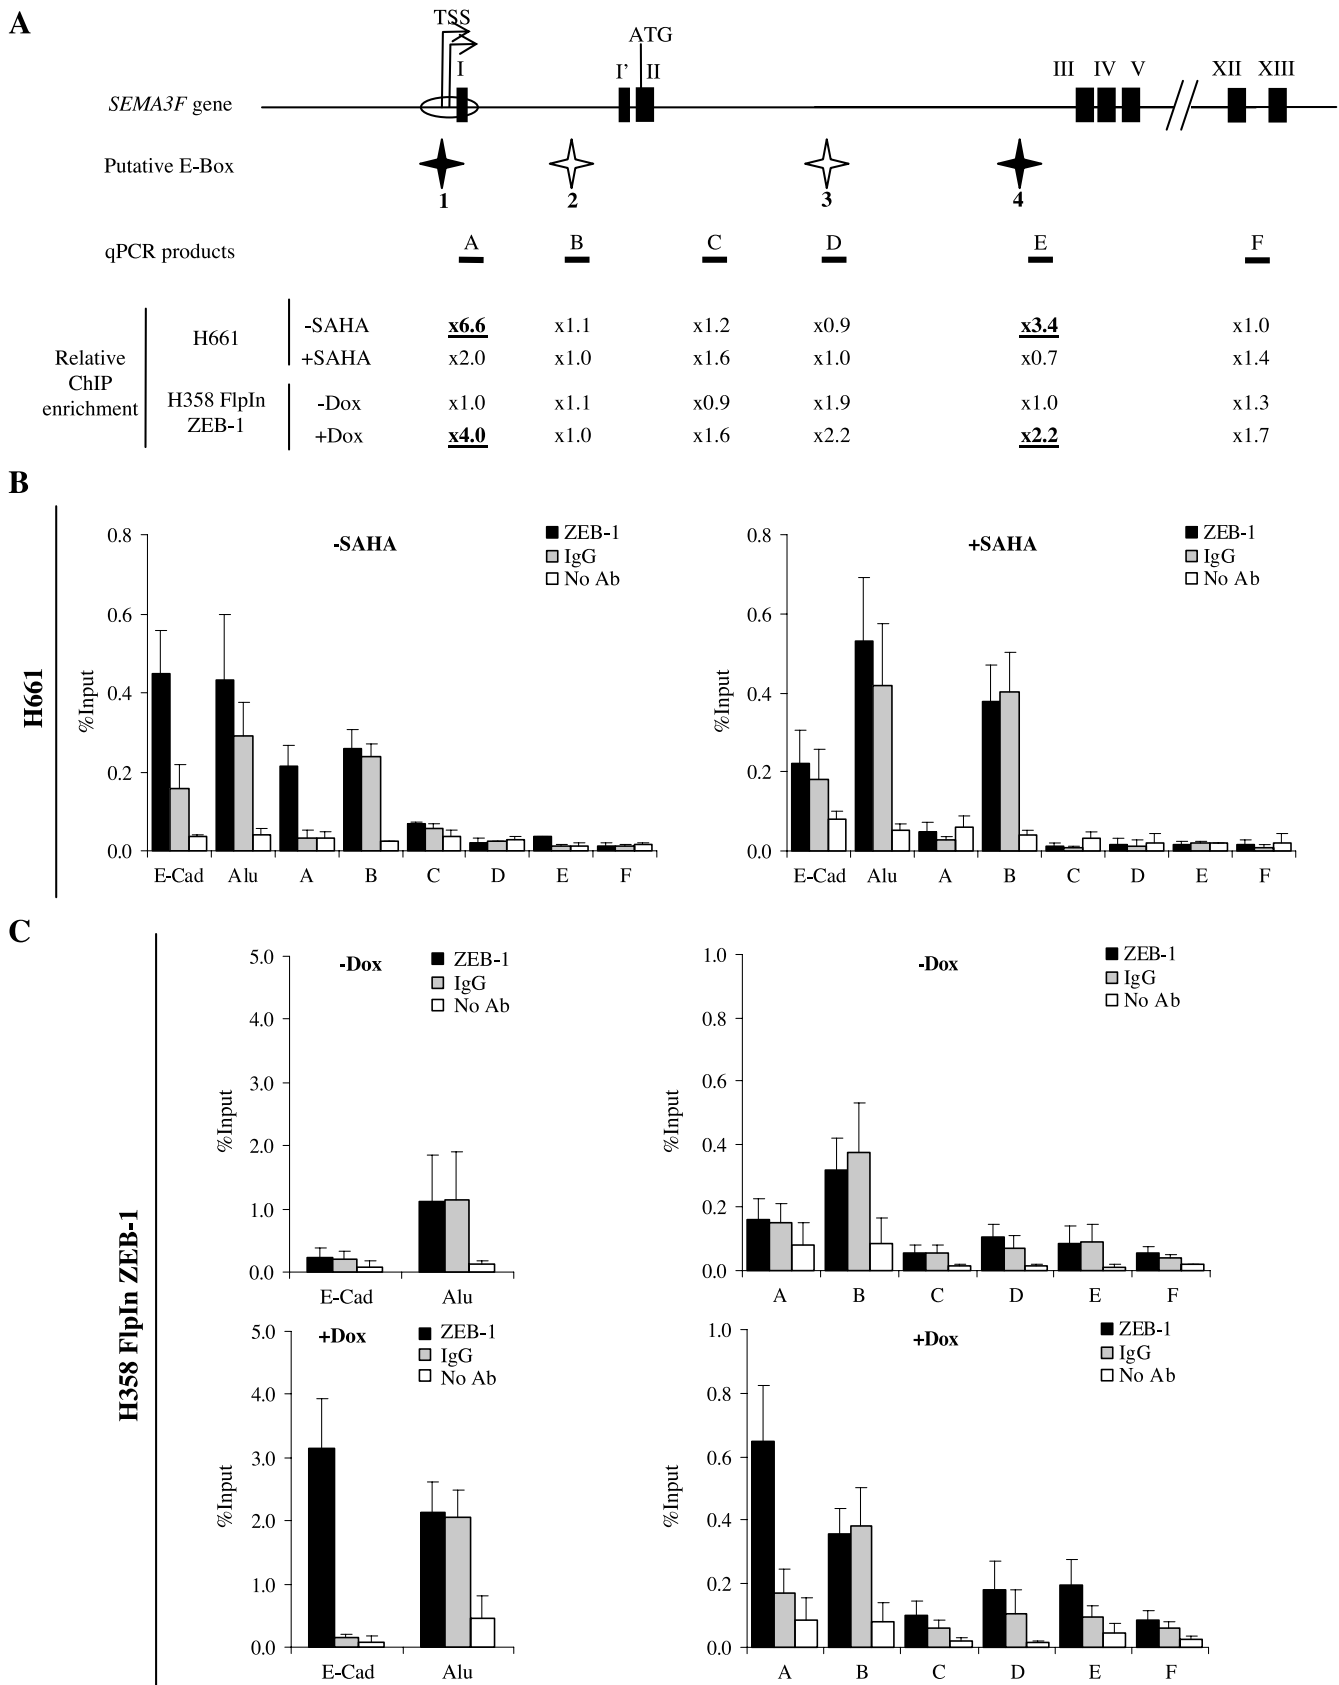

**Figure W1.** Summary of ZEB-1 binding sites in *SEMA3F* in H661 and H358 FlpIn ZEB-1 cells. (A) E-Box sites that bound ZEB-1 are indicated by black stars (sites 1 and 4), whereas those invalidated are in white (sites 2 and 3). The enrichment factors are given for H661 cells without or with HDAC inhibition by SAHA and for H358 FlpIn ZEB-1 cells without or with ZEB-1 induction by Dox. Percentage of input for the ChIP experiments in H661 cells without or with SAHA (B; left and right, respectively) and in H358 cells (C) without (-Dox) or with (+Dox).

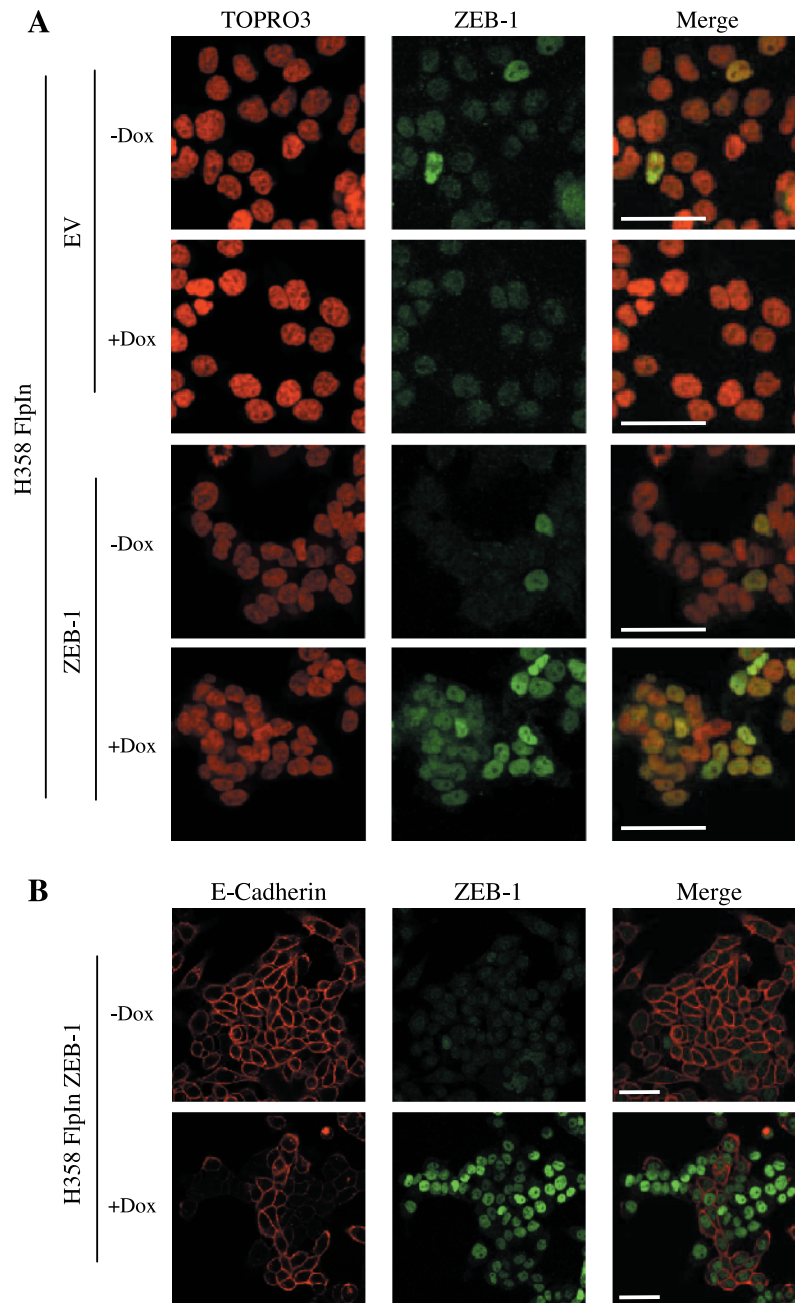

**Figure W2.** Induced ZEB-1 is localized in the nuclei of H358 FlpIn ZEB-1 cells and is present in cells where E-Cadherin is reduced. (A) Immunostaining with ZEB-1 antibody in H358 FlpIn EV or FlpIn ZEB-1 cells induced or not by Dox was performed to check the localization of ZEB-1. Nuclei were stained with the TOPRO3 probe. Three independent experiments were done. (B) Immunostaining with anti-E-Cadherin and anti-ZEB-1 antibodies was done in H358 FlpIn ZEB-1 cells induced or not with Dox. This experiment was done twice.

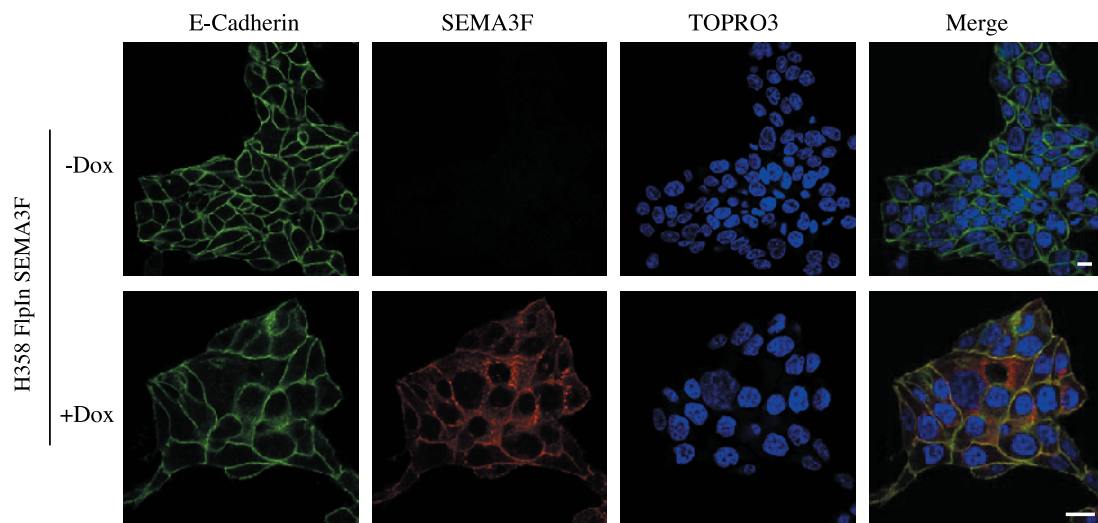

**Figure W3.** E-Cadherin localization is not modified by SEMA3F in H358 cells. Myc-tagged *SEMA3F* cDNA was cloned into pcDNA5/FRT/TO (Invitrogen) at the *EcoRV* site and introduced into H358 FlpIn cells. SEMA3F was induced for 3 days with Dox at 200 ng/ml. Cells were fixed with 3.7% formaldehyde for 20 minutes. Immunostaining with anti-E-Cadherin and anti-Myc antibodies was done with or without induction. Nuclei were stained with the TOPRO3 probe.
